# Supplementary material for: Paradoxical Changes: EMMPRIN Tissue and Plasma Levels in Marfan Syndrome-Related Thoracic Aortic Aneurysms
Source: MDPI journal article supplement (doi:10.3390/jcm13061548), 2024-03-08
Supplement: s1 [file s1]

### Supplemental file 1: Detailed Patient Demographics

For MFS TAA tissue, sex was distributed: 63.64% male and 36.36% female. One individual identified as Hispanic while all others were non-Hispanic. The average age was  $31 \pm 2$  years. Non-TAA control aortic tissues were harvested from the ascending aorta of heart transplant donors or recipients; mean ages are  $58 \pm 6$  years; aortic diameters are  $3.8 \pm 0.2$  cm with no prior diagnosis of MFS. For MFS TAA plasma, sex distribution was 54.79% male and 45.21% female. The average age was  $38.48 \pm 16.98$  years. Non-TAA control plasma was 50.82% male 49.18% female. The average age was  $42.08 \pm 16.63$  years. Further details are listed below:

#### Control Plasma Demographics Summary

- Sex:
  - Male (n = 62)
    - Age:  $42.11 \pm 15.72$
  - Female (n = 60)
    - Age:  $42.05 \pm 17.66$
- Ethnicity:
  - Unknown (n = 19)
    - Age:  $43.37 \pm 16.55$
  - American Indian/Alaska Native (n = 6)
    - Age:  $41.83 \pm 10.87$
  - Asian (n = 2)
    - Age:  $19.5 \pm 2.12$
  - Black/African American (n = 3)
    - Age:  $34.33 \pm 14.57$
  - Hispanic/Latino (n = 12)
    - Age:  $33.92 \pm 19.84$
  - Other (n = 1)
    - Age: 61
  - White/Caucasian (n = 79)
    - Age:  $43.66 \pm 16.25$

#### Marfan TAA Plasma Demographics Summary

- Sex:
  - Male (n = 40)
    - Age:  $39.52 \pm 17.72$
  - Female (n = 33)
    - Age:  $37.22 \pm 16.21$
- Ethnicity:
  - Asian (n = 1)
    - Age: 66.86
  - Black/African American (n = 2)
    - Age:  $46.73 \pm 12.93$
  - Native Hawaiian/Pacific Islander (n = 2)
    - Age:  $28.18 \pm 6.00$
  - Not Specified (n = 32)
    - Age:  $35.18 \pm 16.31$
  - White (n = 36)
    - Age:  $40.74 \pm 17.42$



## SUPPLEMENT - DETAILED METHODOLOGY

*Multiplex Suspension Array (MSA):* MSAs were used to measure MMPs and TIMPs in human plasma and aortic tissue (FCSTM07 and LKTM003, R&D Systems) following manufacturer's instructions. In short, aortic tissues were homogenized in 4°C buffer (volume 1:6 weight/volume) containing 10 mM cacodylic acid pH 5.0, 0.15 M NaCl, 10 mM ZnCl<sub>2</sub>, 1.5 mM NaN<sub>3</sub>, and 0.01% Triton X-100. Homogenates were centrifuged (800 x g, 10 min, 4°C) and protein concentration was determined by BCA assay and 20 µg of total protein was analyzed. Plasma specimens were thawed on ice, centrifuged (16,000 x g, 4 min, 4°C) and diluted according to the manufacturer instructions. For MMP-2 and -9, samples were diluted 1:100; for all other MMPs, samples were diluted 1:10; for TIMPs, samples were diluted 1:20. The above assays were quantitated using a Bio-Rad Bioplex-200 analyzer. Results were compared to a standard curve from the same plate. Using analyte concentrations, fold changes from control values were calculated.

*Immunoblotting analysis:* Thawed tissues were transferred to 4°C homogenization buffer (buffer volume 1:6 weight/volume) containing 137 mM NaCl, 2.7 mM KCl, 8 mM Na<sub>2</sub>HPO<sub>4</sub>, and 2 mM KH<sub>2</sub>PO<sub>4</sub>, and disrupted in a 1mL glass tissue grinder. Homogenates were centrifuged (10,000 rpm, 2 min, 4°C) and the supernatants were used for immunoblotting. Ten µg, determined by BCA assay, of each aortic homogenate were loaded on a 4–15% gradient, bis-tris gel and fractionated by electrophoresis. Proteins were transferred to nitrocellulose membranes (0.45 µm, Bio-Rad, Hercules, CA) and incubated in antisera specific for MT1-MMP (1:2000; ab38971, Abcam) which was diluted in 5% bovine serum albumin (BSA)/PBS. A secondary peroxidase-conjugated antibody (primary antibody species-specific) was applied (1:5000, 5% BSA/PBS) and signals were detected with chemiluminescent substrate (SuperSignal West Pico PLUS Chemiluminescent Substrate, Thermo Fisher Scientific, Waltham, MA) and recorded using the Bio-Rad ChemiDoc XRS. Band intensity was quantified using ImageJ. Gels were normalized using two methods (further described in Results: *MT1-MMP protein abundance was increased in*

*MFS TAA tissue*). After performing MT1-MMP analysis, the nitrocellulose membranes were washed with a harsh stripping buffer containing 20 mL SDS 10%, 12.5 mL Tris HCl - pH 6.8 - 0.5 M, 67.5 mL distilled water, 0.8 mL  $\beta$ -mercaptoethanol. The membrane was then incubated in antisera specific for GAPDH (1:2500; Cat#31460, Thermo Fisher Scientific, Waltham, MA) diluted in 5% bovine serum albumin (BSA)/PBS. The second method of normalization was total protein densitometry from 20-120 kDa, using ultraviolet light activated trihalo. This normalization method provided the least amount of variation and was therefore used for data analysis.

*Cell Culture:* Primary aortic fibroblast cell lines (n=3) were established from human aortic biopsies of non-syndromic aneurysmal thoracic aortas using an established outgrowth technique as previously described.<sup>3</sup> The isolated aortic fibroblasts were maintained in complete fibroblast-specific growth media (Fibroblast Growth Media 2; C-23020, PromoCell, Heidelberg, Germany) with added 10% fetal bovine serum (97068-085), and gentamicin (0.5 mg/mL; 15710-064, Gibco) at 37°C in 5% CO<sub>2</sub>. Aortic fibroblasts from culture passages 2 to 10 were used in the following studies.

*In Vitro Transfection:* Human aortic fibroblasts were transfected for 18 hours at 50% confluence in 75 cm<sup>2</sup> flasks (430641U; Corning) using jetPRIME transfection reagent (114-15, Polypolus-transfection) according to the DNA transfection protocol with either 10  $\mu$ g MT1-MMP Over Expression vector (MT1-OE; OriGene, MC219253) or transfection reagent alone. Transfected fibroblasts were lifted with Tryp-LE (12604021, Thermo Fisher Scientific), and 200,000 cells per well were seeded in 6-well culture dishes. Serum-free culture media was exposed to the transfected cells and collected 48 hours later. Media was centrifuged at 2,000 x g for 10 minutes to remove debris and stored at -20°C.

*Alteration of MT1-MMP Localization:* MT1-MMP can be differentially located in aortic fibroblasts; protein kinase C-mediated phosphorylation of the C-terminal tail of MT1-MMP causes translocation of MT1-MMP from the membrane to endosomal vesicles in the cytoplasm.

Treatment with phorbol 12-myristate 13-acetate (PMA), which activates both classical and novel PKCs, results in enhanced internalization of MT1-MMP. Conversely, translocation of MT1-MMP can be inhibited with Röttlerin, a PKC- $\delta$ -specific inhibitor. PMA was used to induce internalization of MT1-MMP in isolated fibroblasts while Röttlerin was used to confine it to the cell surface. Primary human aortic fibroblasts were seeded in 6-well plates with 200,000 cells per well and cultured in complete growth media. Cells were cultured (37°C, 5% CO<sub>2</sub>) until >75% confluence and treated for 24 hours: PMA (100 nM), Röttlerin (3  $\mu$ M), or vehicle control (DMSO, 1:1000). After transfection, the cells were exposed to serum-free culture media. The conditioned serum-free media was collected after 24 hours exposure, centrifuged at 2,000 x g for 10 minutes to remove debris, and stored at -20°C.

*Soluble EMMPRIN ELISA:* A human EMMPRIN ELISA (ab219631, Abcam) was performed on the conditioned media according to protocol. In brief, 50  $\mu$ L of standards or sample were added to the appropriate wells and exposed to 50  $\mu$ L of antibody cocktail. After 1 hour of incubation at room temperature, the liquid was aspirated, and the wells were washed three times with 350  $\mu$ L of the recommended wash buffer. Wells were incubated in 100  $\mu$ L of the recommended development solution for 10 minutes; development was stopped with an equal volume of the recommended stop solution. The plate was measured at an OD value of 450 nm.
